# Supplementary material for: Green Synthesis of TiO2 Nanoparticles Using Natural Marine Extracts for Antifouling Activity
Source: MDPI journal article supplement (doi:10.3390/md21020062), 2023-01-19
Supplement: s1 [file s1]

## SUPPLEMENTARY MATERIAL

### Green synthesis of TiO<sub>2</sub> nanoparticles using natural marine extracts for antifouling activity

Walied M. Alarif<sup>1</sup>, Yasser A. Shaban<sup>1\*</sup>, Mohamed I. Orif<sup>1</sup>, Mohamed A. Ghandourah<sup>1</sup>, Adnan J. Turki<sup>1</sup>, Hajer S. Alorfi<sup>2</sup> and Hermine R. Z. Tadros<sup>3</sup>

<sup>1</sup> Department of Marine Chemistry, Faculty of Marine Sciences, King Abdulaziz University, Jeddah 21589, Saudi Arabia; welaref@kau.edu.sa (W.M.A.), ydomah@kau.edu.sa (Y.A.S.), mioraif@kau.edu.sa (M.I.O.), mghandourah@kau.edu.sa (M.A.G.), ajturki@yahoo.com (A.J.T.)

<sup>2</sup> Department of Chemistry, Faculty of Science, King Abdulaziz University, Jeddah 21589, Saudi Arabia; halorfi@kau.edu.sa

<sup>3</sup> National Institute of Oceanography and Fisheries, Kayet Bay, Alexandria, Egypt; herminetadros@gmail.com

Correspondence: ydomah@kau.edu.sa (Y.A.S.); Tel.: +966-595-670522

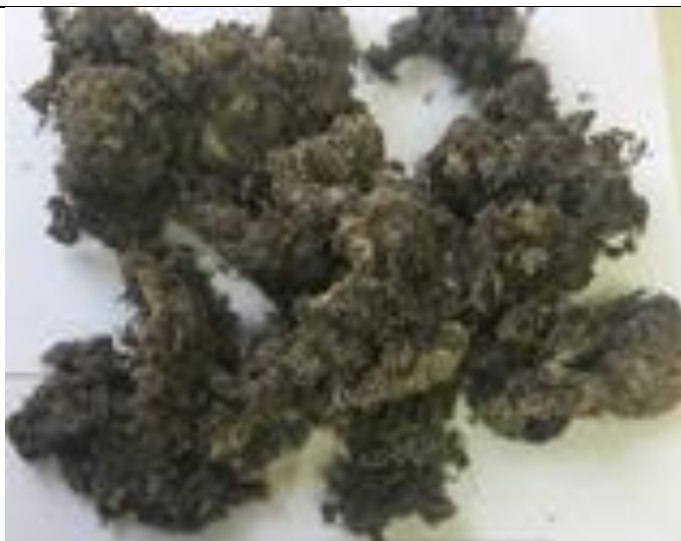

A- *Bostrychia tenella*

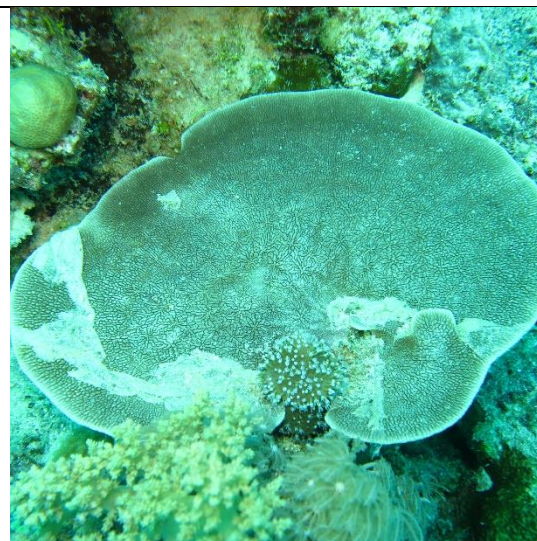

B- *Carteriospongia foliascens*

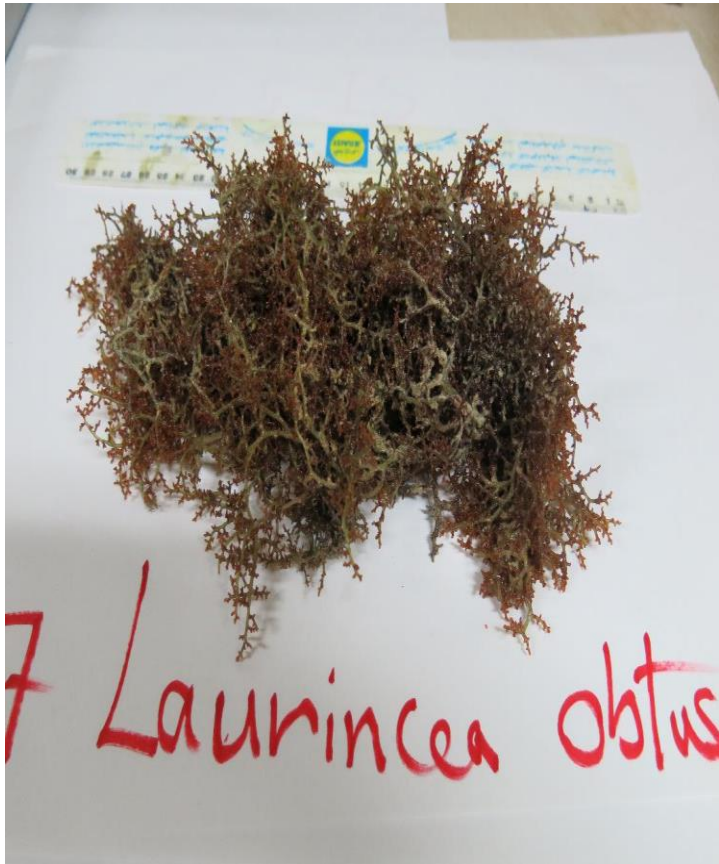

C- *Laurencia obtusa*

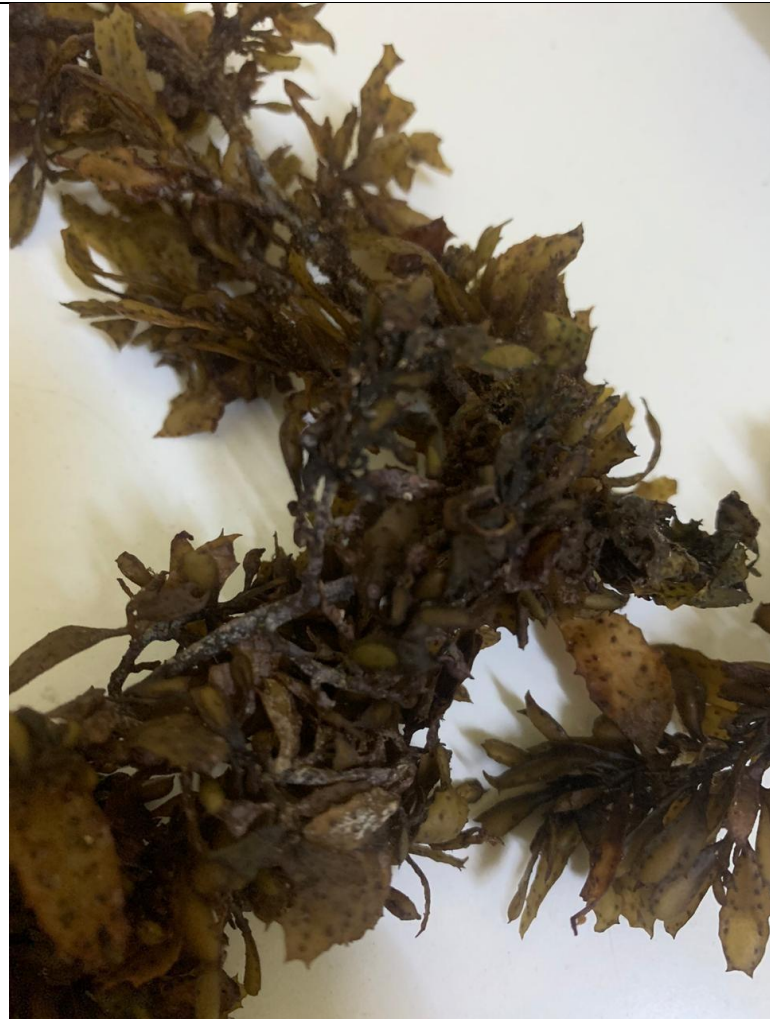

D- *Sargassum filipendula*

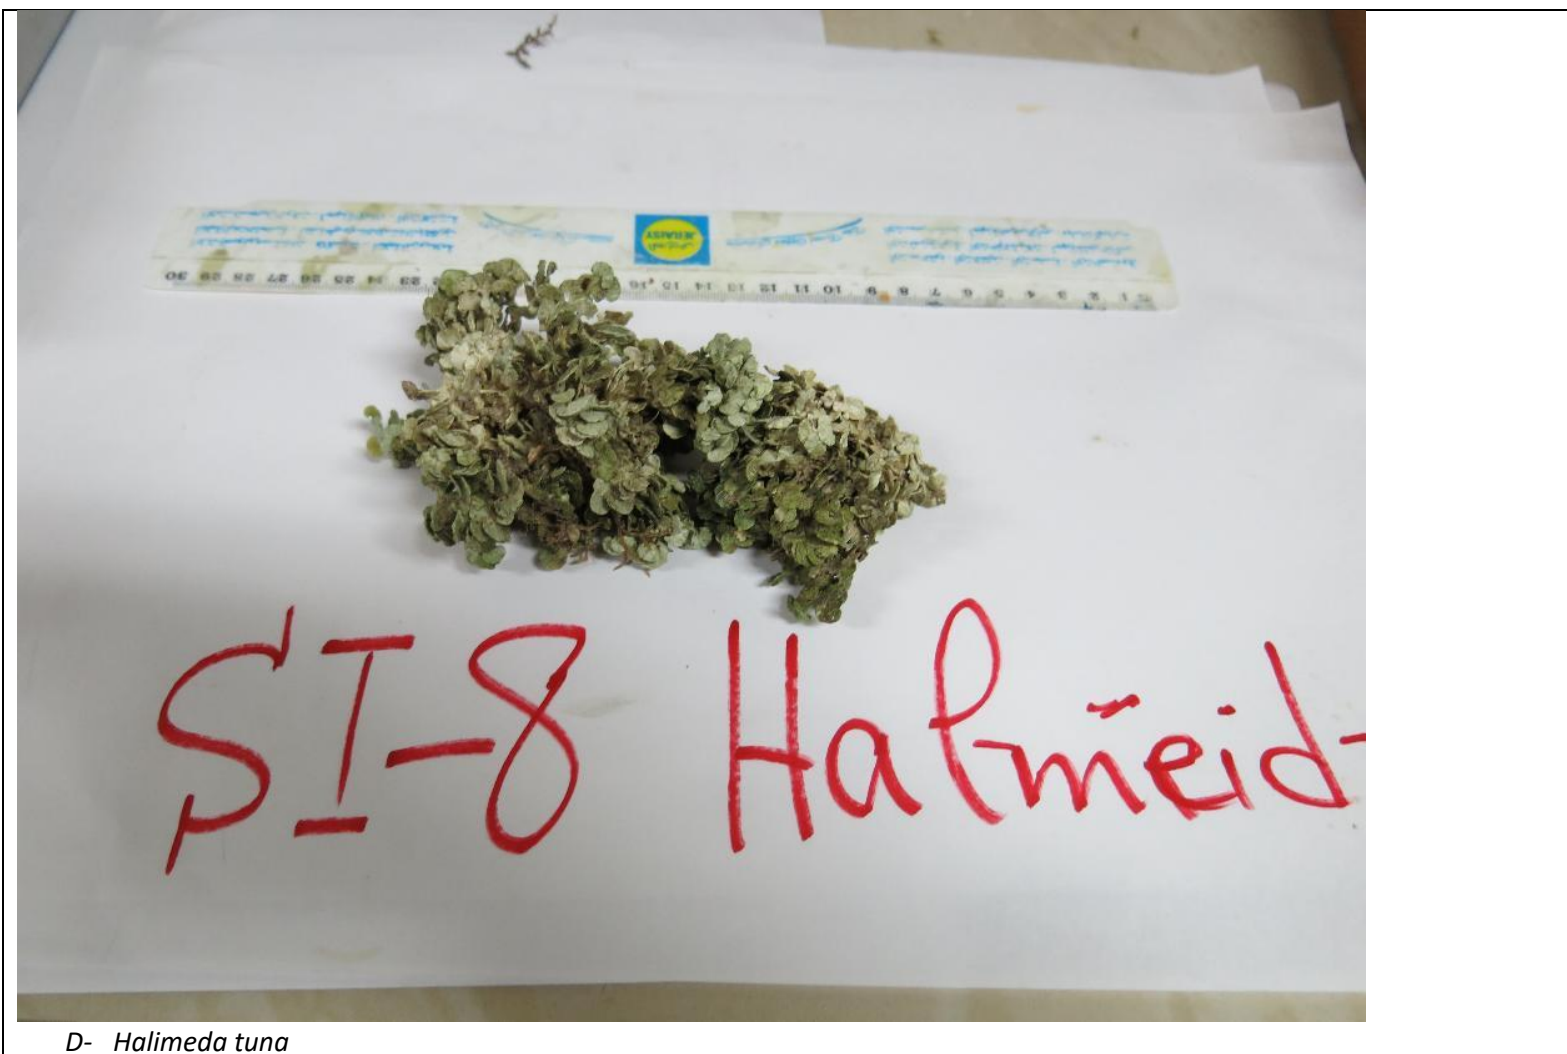

D- *Halimeda tuna*

Figure S1. Images of marine organisms: A- *Bostrychia tenella*, B- *Carteriospongia foliascens*, C- *Laurencia obtusa*, D- *Sargassum filipendula*, and E- *Halimeda tuna*.

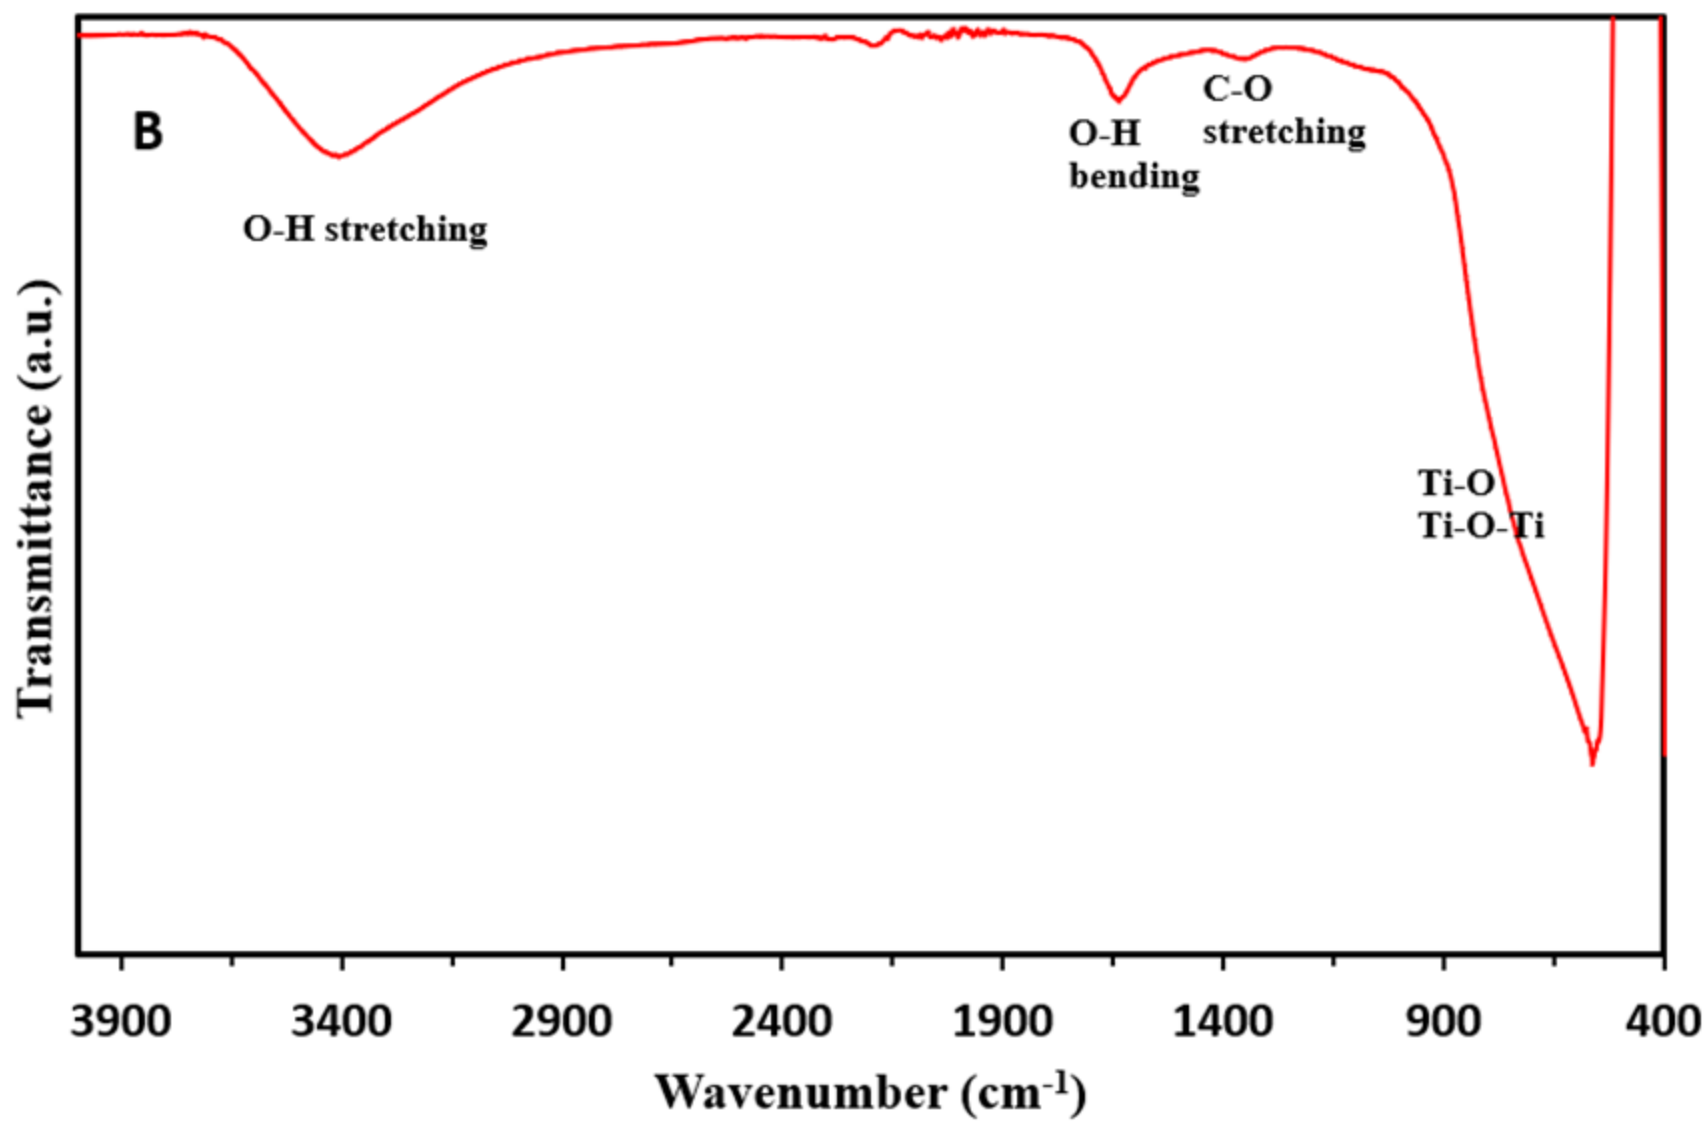

Figure S2. FTIR spectrum of CTiO<sub>2</sub>.

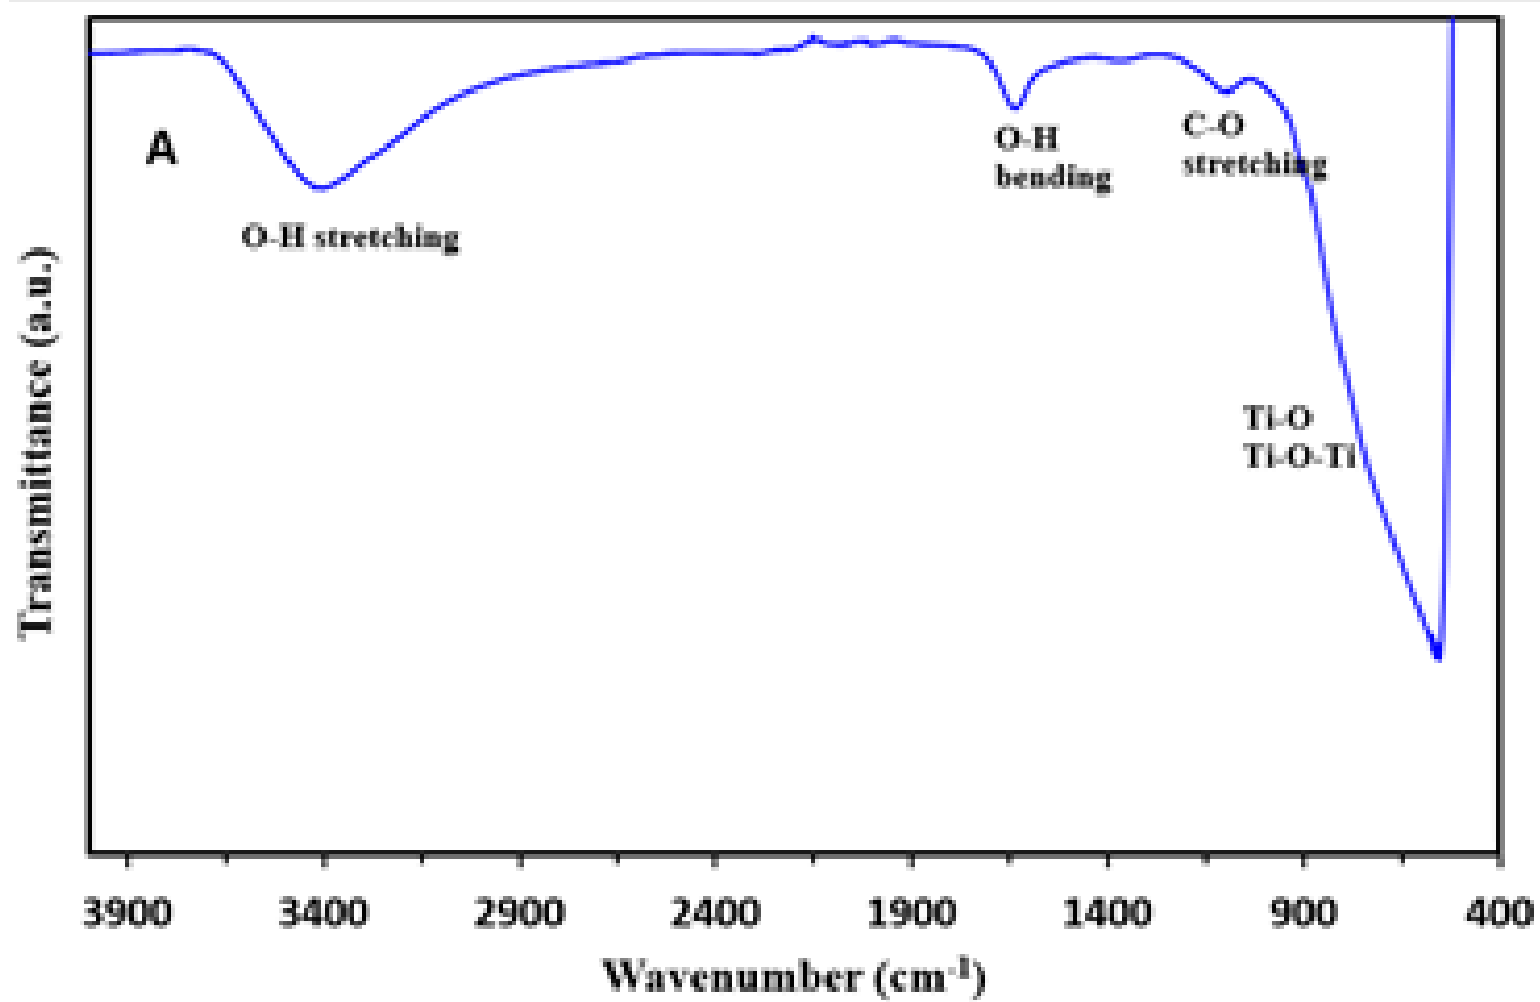

Figure S3. FTIR spectrum of BTiO<sub>2</sub>.

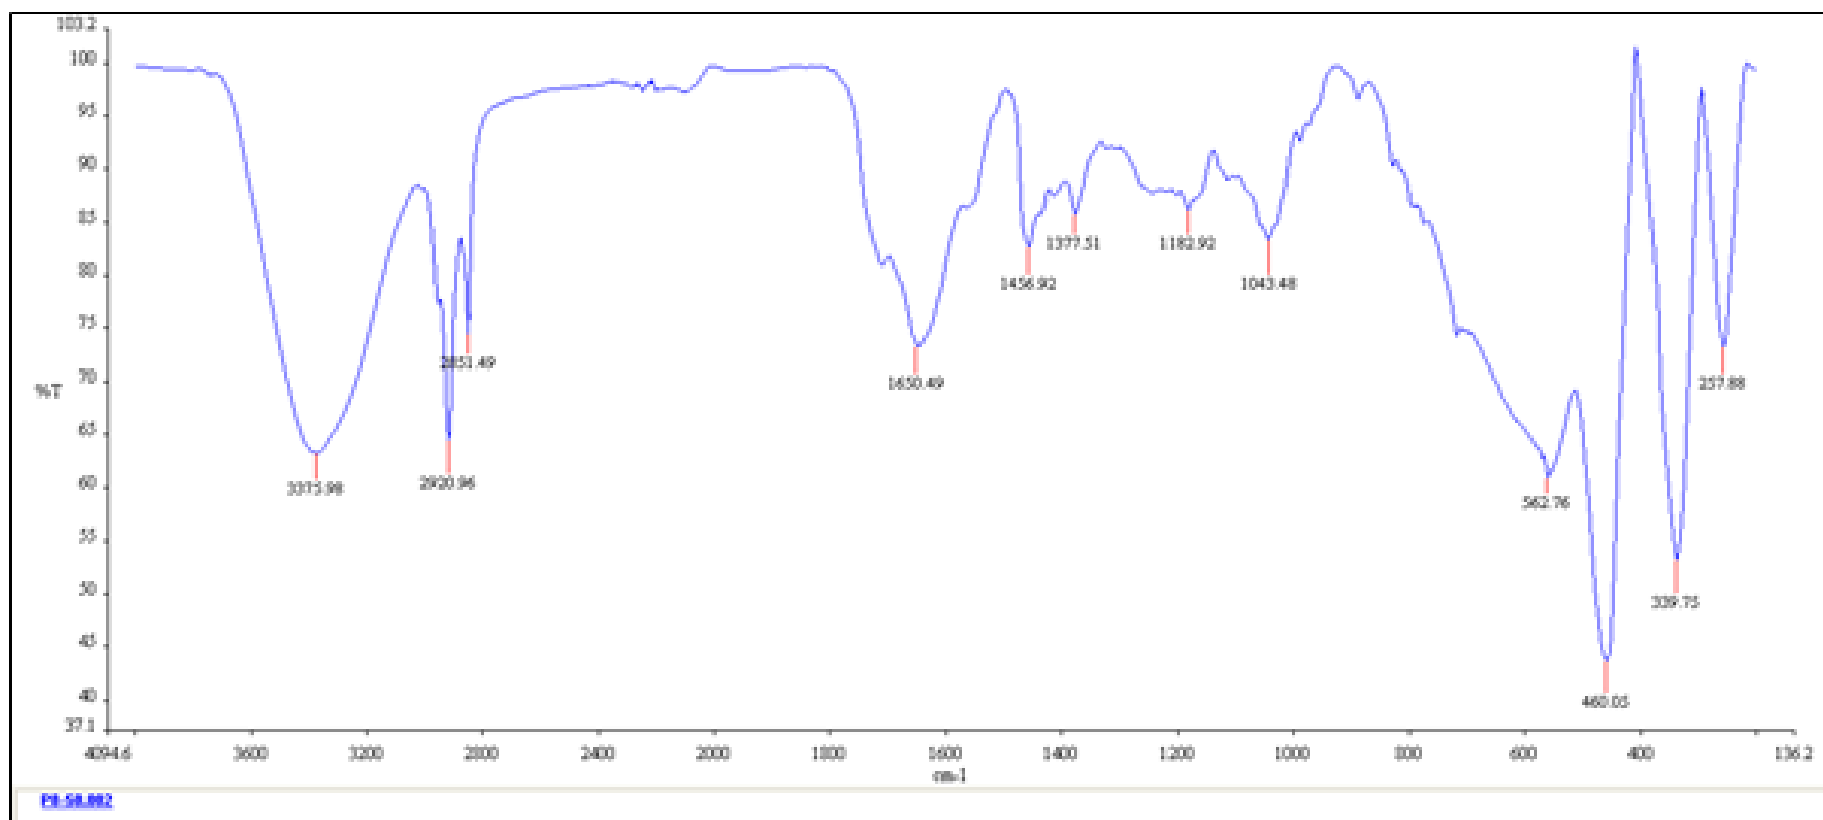

Figure S4. FTIR spectrum of *B. tenella* extract.

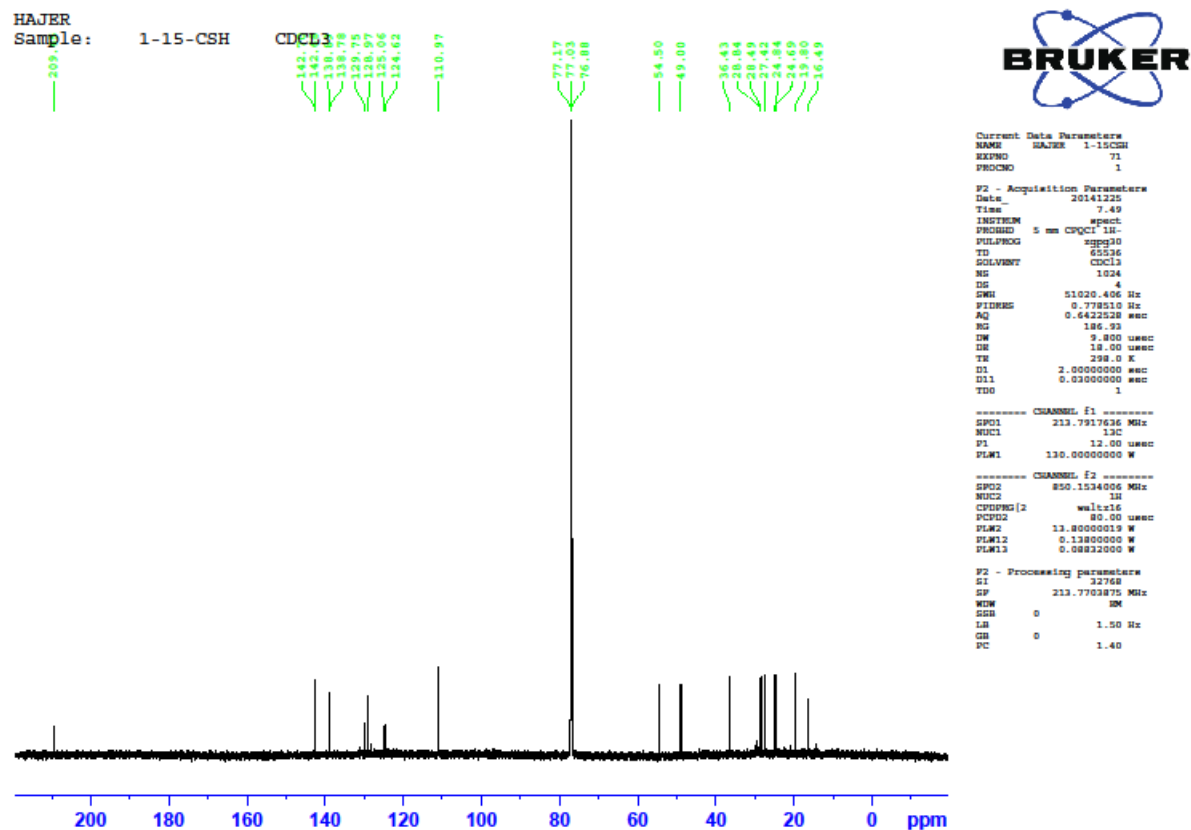

Figure S5. <sup>13</sup>C-NMR of isofurospingin-2 isolated from *C. foliascens*.



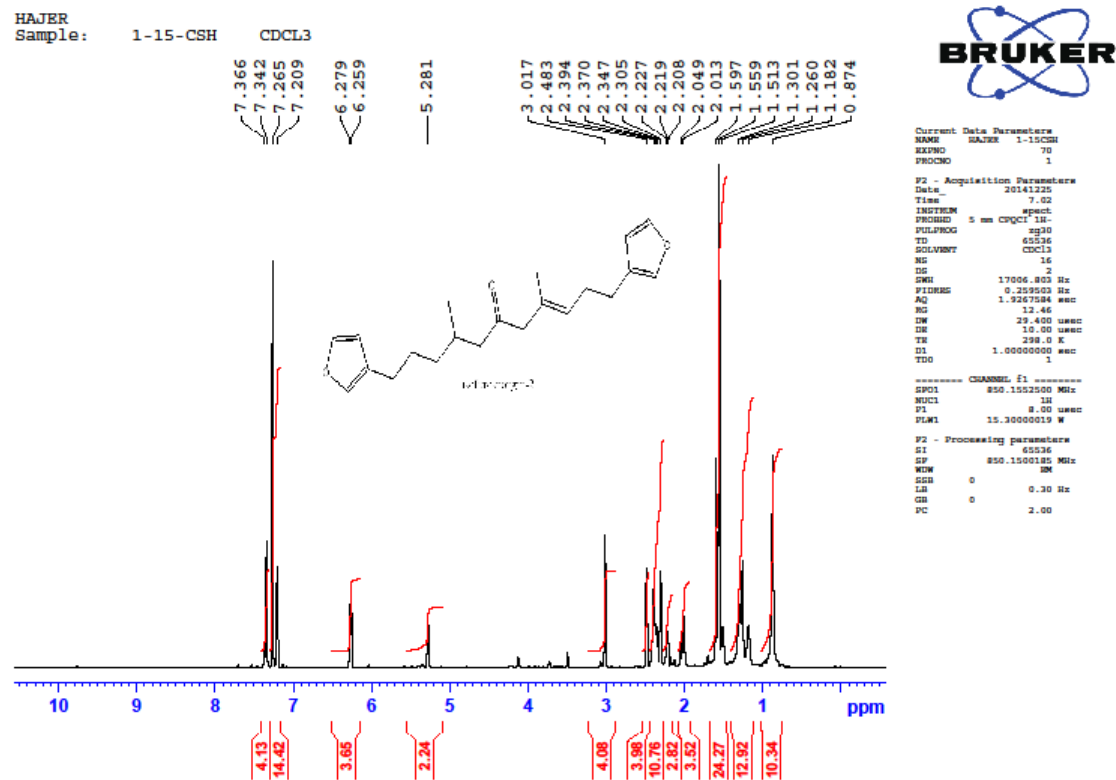

Figure S6. <sup>1</sup>H-NMR of isofurospongins-2 isolated from *C. foliascens*.



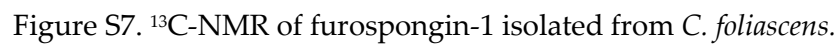

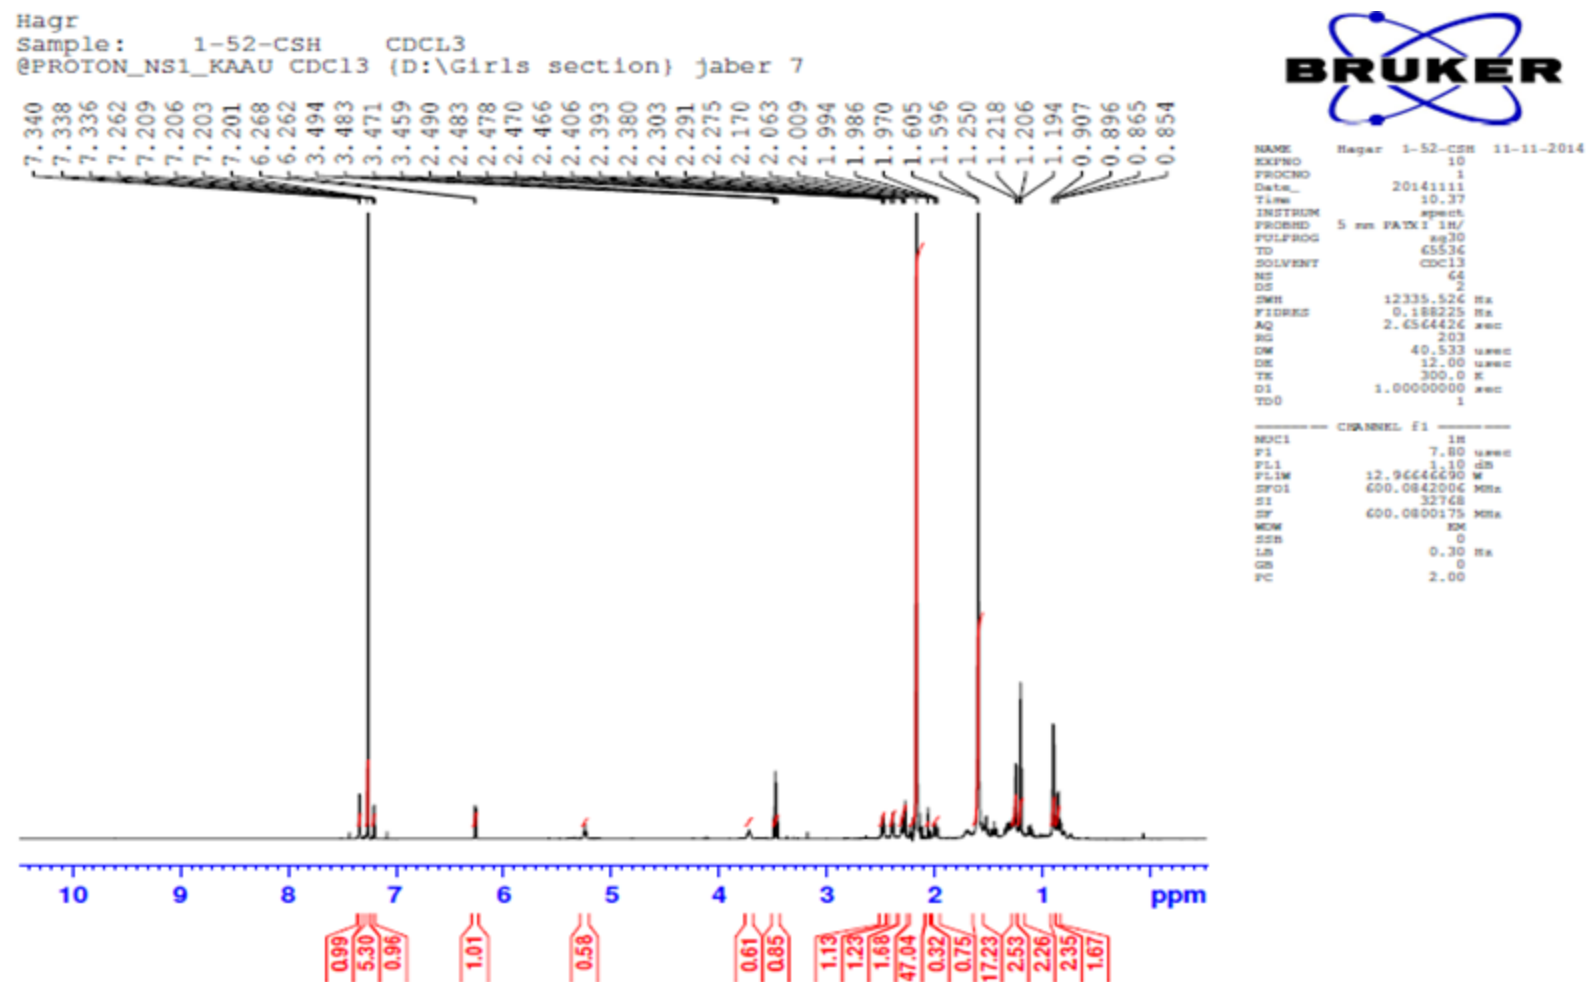

Figure S8.  $^1\text{H}$ -NMR of furospongins-1 isolated from *C. foliascens*.

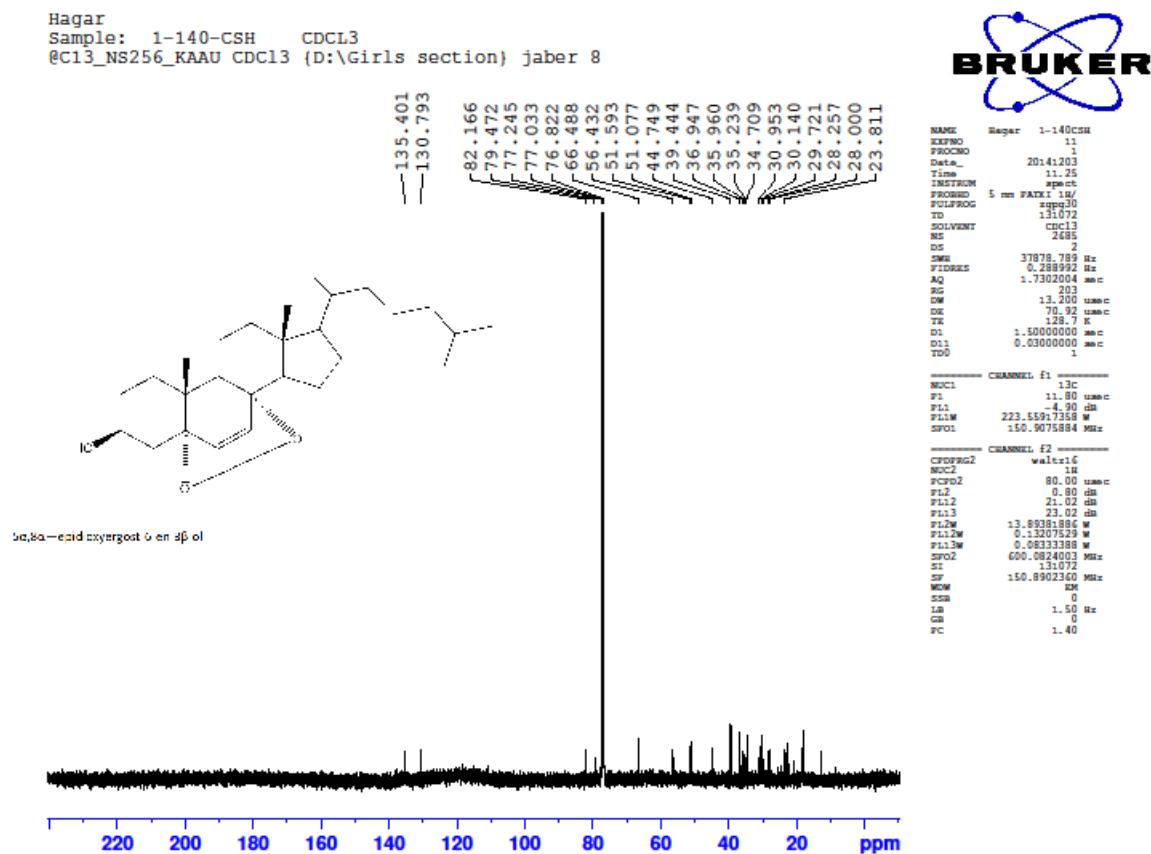

Figure S9.  $^{13}\text{C}$ -NMR of 5 $\alpha$ ,8 $\alpha$ -epidioxyergost-6-en-3 $\beta$ -ol isolated from *C. foliascens*.

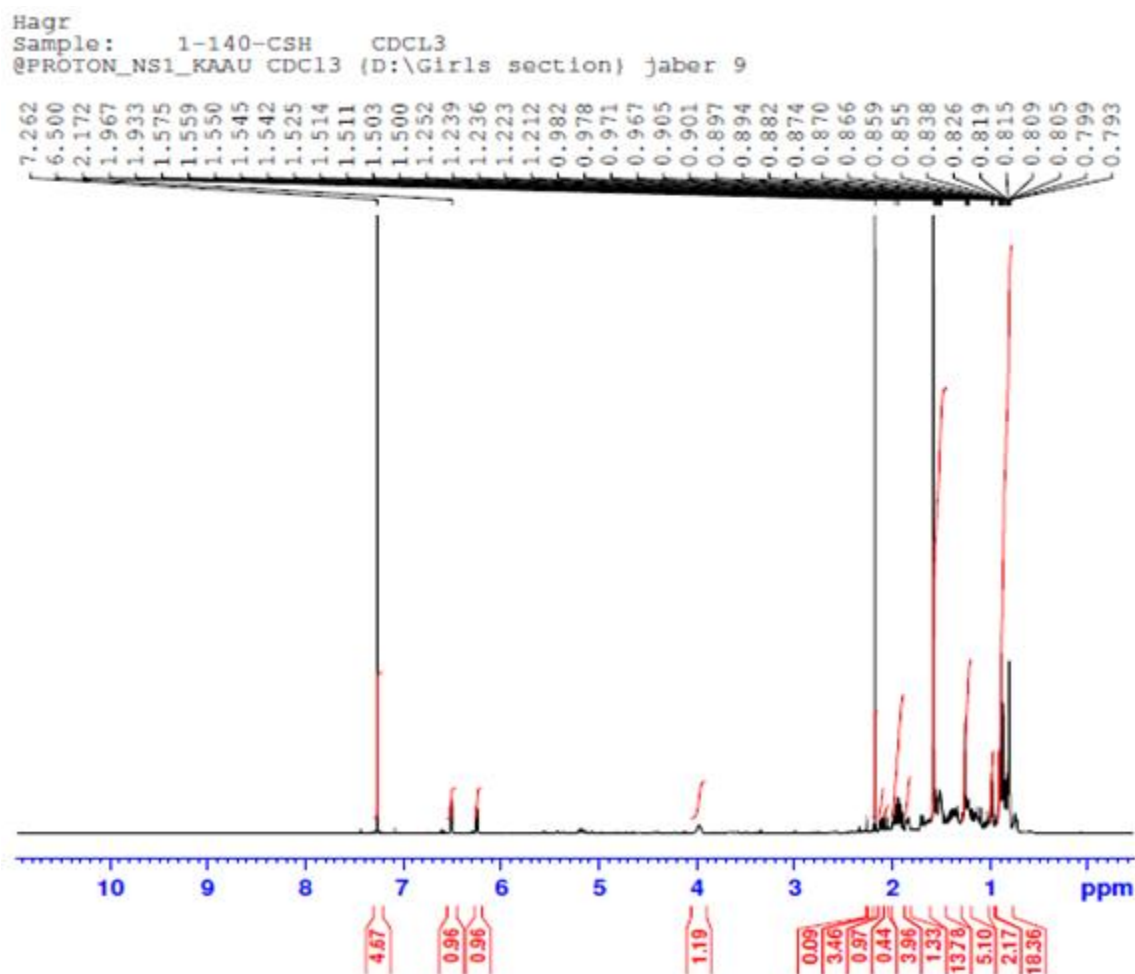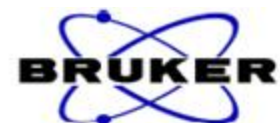

NAME Hagar 1-140-CSH 11-11-2014  
 KATNO 10  
 PROBN 1  
 Date 20141111  
 Time 10:53  
 INSTRUM spect  
 PROBN 5 mm PAK11 1H/  
 PULPROG zgpg30  
 TO 41534  
 SOLVENT CDCL3  
 NS 64  
 DS 2  
 SWS 12325.524 Hz  
 FIDRES 0.188225 Hz  
 AQ 2.4564426 sec  
 RG 203  
 SW 45.523 ussec  
 DE 12.00 ussec  
 TE 300.00 K  
 D1 1.00000000 sec  
 TDC 1  
 CHANNEL F1  
 NUC1 1H  
 P1 7.80 ussec  
 PL1 0.00 dB  
 PL1M 12.96646690 W  
 SFO1 600.0842006 MHz  
 IC 22768  
 SC 600.080175 MHz  
 WDM 8M  
 SSF 0  
 LB 0.20 Hz  
 GB 0  
 PC 2.00

Figure S10.  $^1\text{H}$ -NMR of  $5\alpha,8\alpha$ -epidioxyergost-6-en- $3\beta$ -ol isolated from *C. foliascens*.

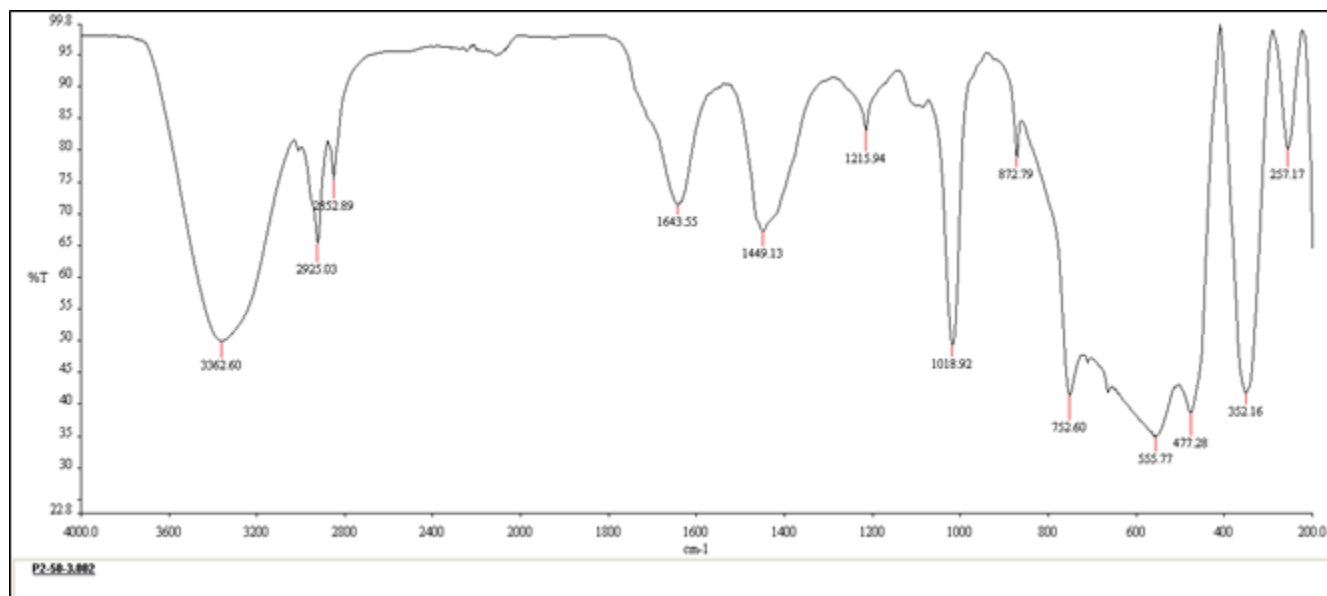

Figure S11. FTIR spectrum of *C. foliascens* extract.
